# Supplementary material for: A Nomogram Based on Glycolysis-related Gene Expression Profilings Serve as a Novel Prognosis Risk Classifiers for Human Hepatocellular Carcinoma
Source: Research Square preprint supplement (doi:10.21203/rs.3.rs-324874/v1), 2021-03-24
Supplement: Supplementary file 2 [file a824c210bb7eedc0f9362fd0.docx]

| **Clinicopathological Characteristics** | **Risk Score (OS)** | | | | **χ2** | ***P* value** |
| --- | --- | --- | --- | --- | --- | --- |
| **High Risk n (%)** | | **Low Risk n (%)** | |
| **Gender** |  |  |  |  | 2.553 | 0.1101 |
| Male | 91(47.64%) | | 100(52.36%) | |  |  |
| Female | 19(63.33%) | | 11(36.67%) | |  |  |
| **Age** |  |  |  |  | 0.0430 | 0.8355 |
| ≤65 | 100(50.00%) | | 100(50.00%) | |  |  |
| >65 | 10(47.62%) | | 11(52.38%) | |  |  |
| **Stage** |  |  |  |  | 39.37 | <0.001 |
| I | 26(27.96%) | | 67(72.04%) | |  |  |
| II | 43(55.13%) | | 35(44.87%) | |  |  |
| III | 41(82.00%) | | 9(18.00%) | |  |  |
| **BCLC Staging** |  |  |  |  | 28.23 | <0.001 |
| Zero | 9(42.86%) | | 12(57.14%) | |  |  |
| A | 59(39.60%) | | 90(60.40%) | |  |  |
| B | 18(81.82%) | | 4(18.18%) | |  |  |
| C | 24(82.76%) | | 5(17.24%) | |  |  |
| **Child Pugh Score** |  | |  | | 26.43 | <0.001 |
| A | 32(32.99%) | | 65(67.01%) | |  |  |
| B | 40(53.33%) | | 35(46.67%) | |  |  |
| C | 38(77.55%) | | 11(22.45%) | |  |  |
| **Cirrhosis** |  | |  | | 3.792 | 0.0515 |
| NO | 5(27.78%) | | 13(72.22%) | |  |  |
| YES | 105(51.72%) | | 98(48.28%) | |  |  |
| **Multi Nodular** |  | |  | | 8.259 | 0.0041 |
| NO | 79(44.89%) | | 97(55.11%) | |  |  |
| YES | 31(68.89%) | | 14(31.11%) | |  |  |
| Tumor Size |  | |  | | 12.54 | <0.001 |
| <=5 | 57(40.71%) | | 83(59.29%) | |  |  |
| >5 | 53(65.43%) | | 28(34.57%) | |  |  |
| **AFP** |  |  |  |  | 14.79 | <0.001 |
| <=300 | 46(38.02%) | | 75(61.98%) | |  |  |
| >300 | 64(64.00%) | | 36(36.00%) | |  |  |
| ALT |  | |  | | 1.655 | 0.1983 |
| <=50 | 60(46.15%) | | 70(53.85%) | |  |  |
| >50 | 50(54.95%) | | 41(45.05%) | |  |  |
| **Recurrence Event** |  |  |  |  | 23.08 | <0.001 |
| NO | 32(32.00%) | | 68(68.00%) | |  |  |
| YES | 78(64.46%) | | 43(35.54%) | |  |  |
| **Status** |  | |  | | 54.48 | <0.001 |
| Alive | 41(30.15%) | | 95(69.85%) | |  |  |
| Dead | 69(81.18%) | | 16(18.82%) | |  |  |

**Table 4** The clinicopathological characteristics of the HCC patients enrolled in the GEO cohort

***P* value was calculated by Pearson chi-square test.**
